# Supplementary figures and images for: Effective factors of improved helmet use in motorcyclists: a systematic review
Source: Research Square preprint supplement (doi:10.21203/rs.3.rs-1830051/v1), 2022-08-11

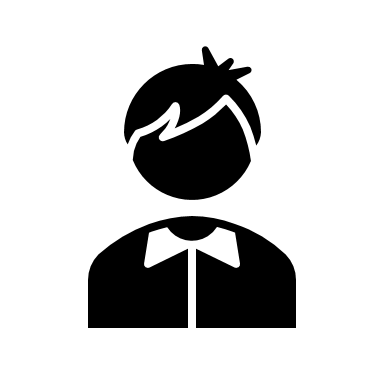

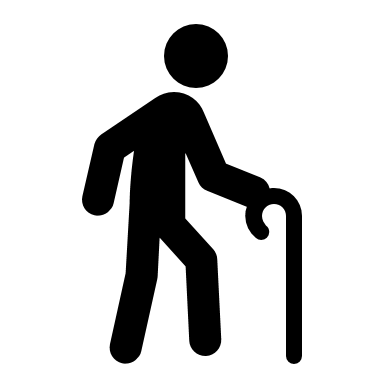

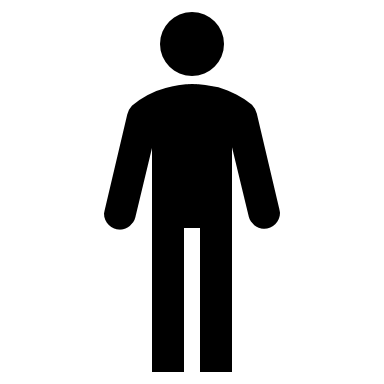

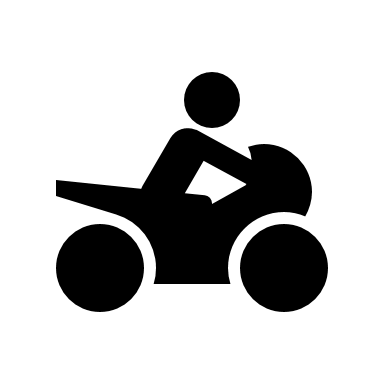

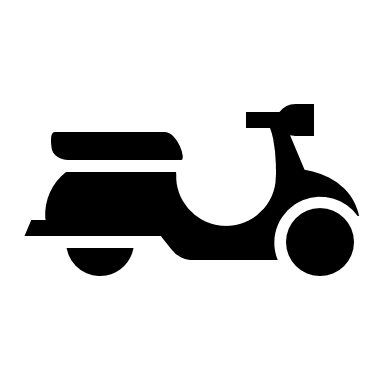

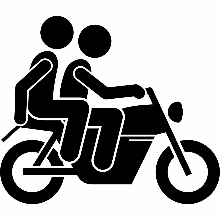

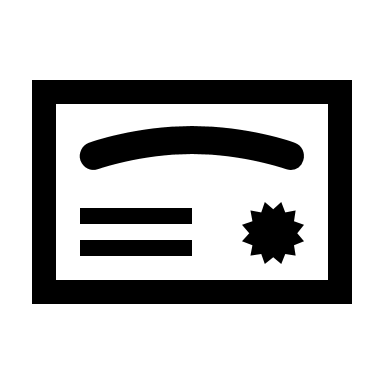

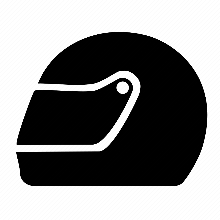

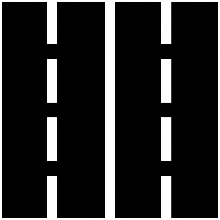

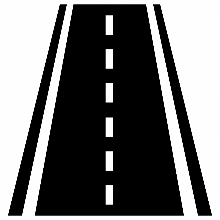

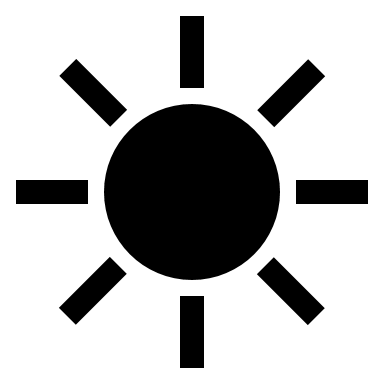

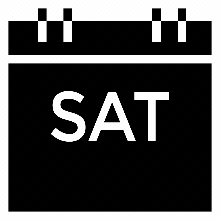

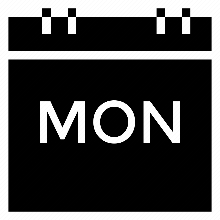

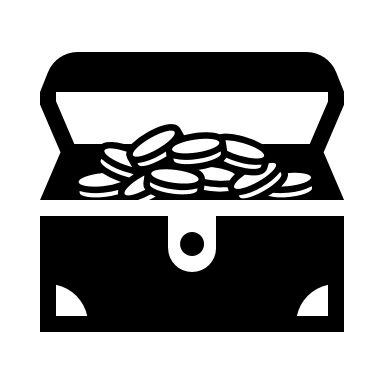

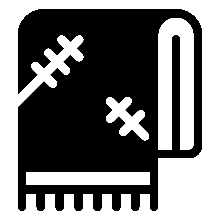

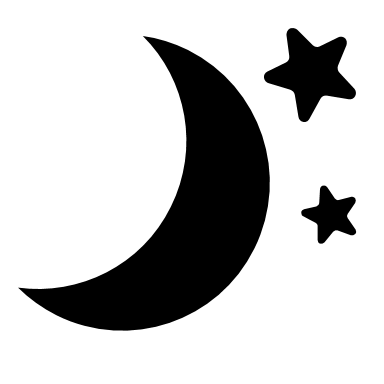

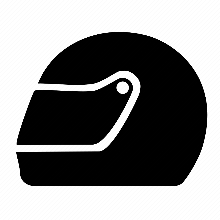

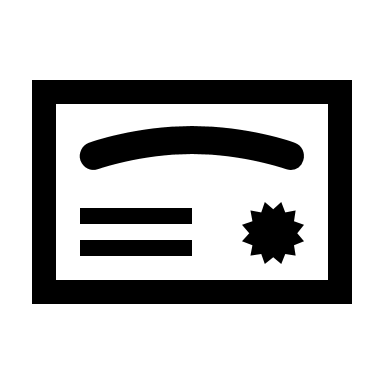

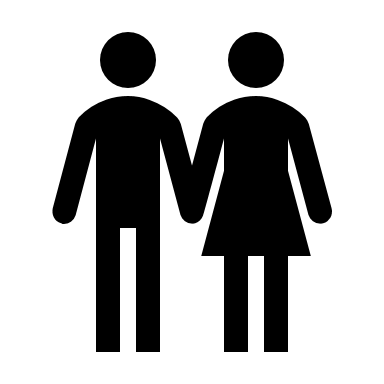

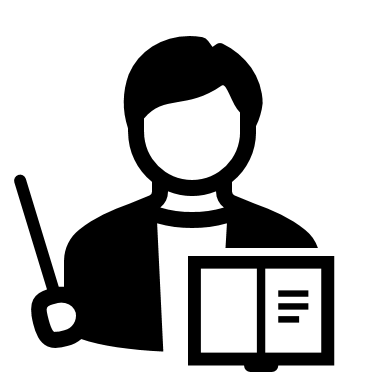

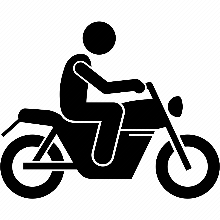

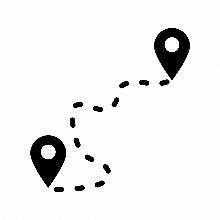

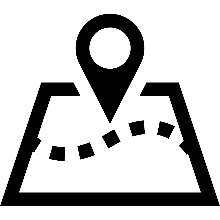

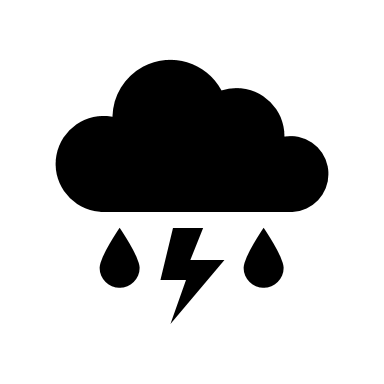

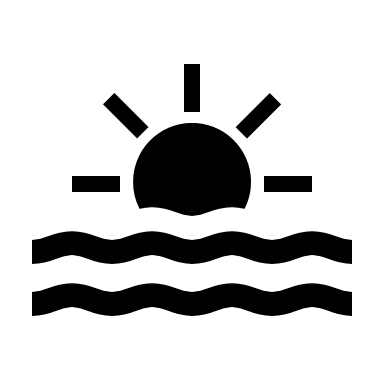

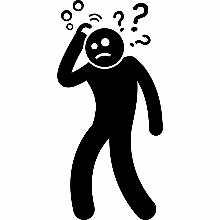

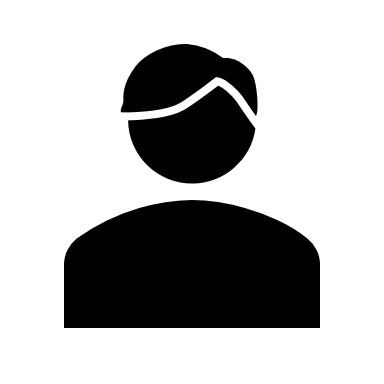

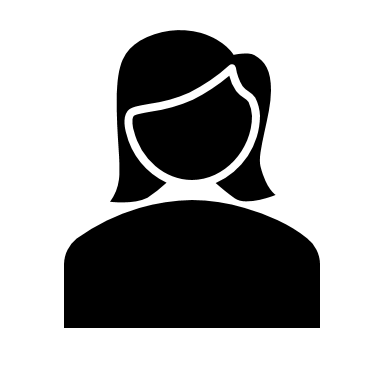

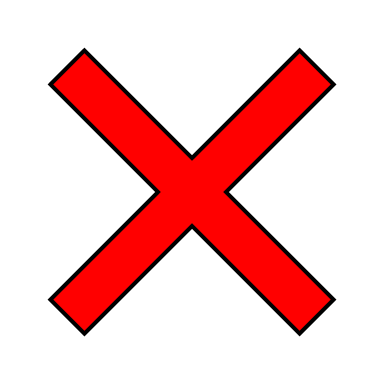

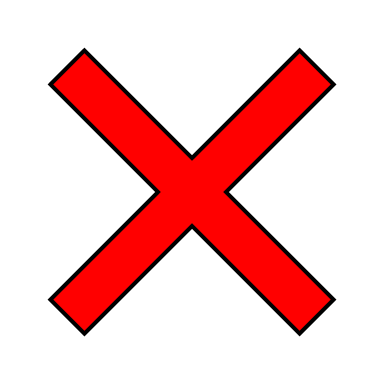

Supplement: Supplementary file 1 [file 41296089b7003736b751f9e2.docx]
